# Supplementary material for: Soil carbon dioxide emissions controlled by an extracellular oxidative metabolism identifiable by its isotope signature
Source: Copernicus journal article supplement (doi:10.5194/bg-13-6353-2016), 2016-11-28
Supplement: Supplementary file 1 [file bg-13-6353-2016-supplement.pdf]

Supplement of Biogeosciences, 13, 6353–6362, 2016  
<http://www.biogeosciences.net/13/6353/2016/>  
doi:10.5194/bg-13-6353-2016-supplement  
© Author(s) 2016. CC Attribution 3.0 License.

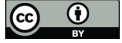

*Supplement of*

## **Soil carbon dioxide emissions controlled by an extracellular oxidative metabolism identifiable by its isotope signature**

**Benoit Kéroual et al.**

*Correspondence to:* Benoit Kéroual ([benoit.keraval@gmail.com](mailto:benoit.keraval@gmail.com))

The copyright of individual parts of the supplement might differ from the CC-BY 3.0 licence.

1 **Supporting Online Material for**

2

3 **Figure S1:** Percentage of initial DOC oxidized to CO<sub>2</sub> during the incubation.

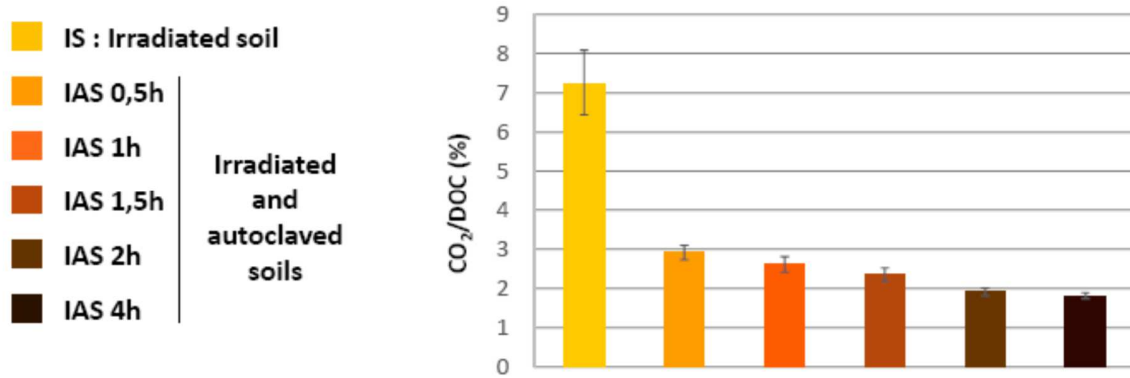

4

5 The percentage of initial DOC oxidized to CO<sub>2</sub> is low for all sterilized soils. This result  
6 indicates that the EXOMET was quantified with an excess of available substrate. This excess  
7 of substrate is favorable to measure the isotope fractionation induced by the EXOMET.

8 The percentage of initial DOC oxidized to CO<sub>2</sub> decreased with the intensity of sterilization  
9 treatments. The large difference between IS and IAS 0.5h (effect of autoclaving) is caused  
10 both by a decrease in CO<sub>2</sub> emissions and an increase in DOC content. The decrease percentage  
11 of initial DOC oxidized to CO<sub>2</sub> with the duration of autoclaving (from 0.5 to 4h) is only caused  
12 by an increase in DOC content. Overall, these results suggest that the efficiency of soil matrix  
13 to mineralize DOC decrease with the intensity of sterilization treatments.
